# Supplementary material for: Insights into Daily Dynamics of Fish Migration during Spring in the Konda River
Source: MDPI journal article supplement (doi:10.3390/d15121211), 2023-12-11
Supplement: s1 [file s1]

**Table S1:** Overview on the sonar data (1296 h) from the spring 2017 survey with the acoustic complex NetCor (455 kHz)

|                                 | <b>Recorded<br/>[h]</b> | <b>Analysed<br/>[h]</b> | <b>Remarks</b>                                                                                                          |
|---------------------------------|-------------------------|-------------------------|-------------------------------------------------------------------------------------------------------------------------|
| NetCor complex («near bank»)    | 27*24 = 648             | 648                     | Data was recorded around the clock from May 1 to May 27, 2017. The complete sonar survey data (648 hours) was analyzed. |
| NetCor complex («main channel») | 27*24 = 648             | 648                     | Data was recorded around the clock from May 1 to May 27, 2017. The complete sonar survey data (648 hours) was analyzed. |
| <b>TOTAL</b>                    | <b>1296</b>             | <b>1296</b>             |                                                                                                                         |
